# Supplementary material for: Chemically doped three-dimensional porous graphene monoliths for high-performance flexible field emitters
Source: Royal Society of Chemistry journal article supplement (doi:10.1039/c4nr07189a), 2015-01-01
Supplement: c4nr07189a1.pdf [file c4nr07189a1.pdf]

## Supplementary Information

### Chemically doped three-dimensional porous graphene monoliths for high-performance flexible field emitters

Ho Young Kim,<sup>ab</sup> Sooyeon Jeong,<sup>c</sup> Seung Yol Jeong,<sup>c</sup> Kang-Jun Baeg,<sup>a</sup> Joong Tark Han,<sup>a</sup>  
Mun Seok Jeong,<sup>\*b</sup> Geon-Woong Lee<sup>\*a</sup> and Hee Jin Jeong,<sup>\*ac</sup>

<sup>a</sup>Nano Hybrid Technology Research Center, Korea Electrotechnology Research Institute (KERI), Changwon 642-120, South Korea. E-mail: gwleephd@keri.re.kr

<sup>b</sup>Center for Integrated Nanostructure Physics, Institute for Basic Science, Department of Energy Science, Sungkyunkwan University, Suwon 440-746, South Korea. E-mail: mjeong@skku.edu

<sup>c</sup>Multidimensional Nanomaterials Research Group, Korea Electrotechnology Research Institute (KERI), Changwon 642-120, South Korea. E-mail: wavicle11@keri.re.kr

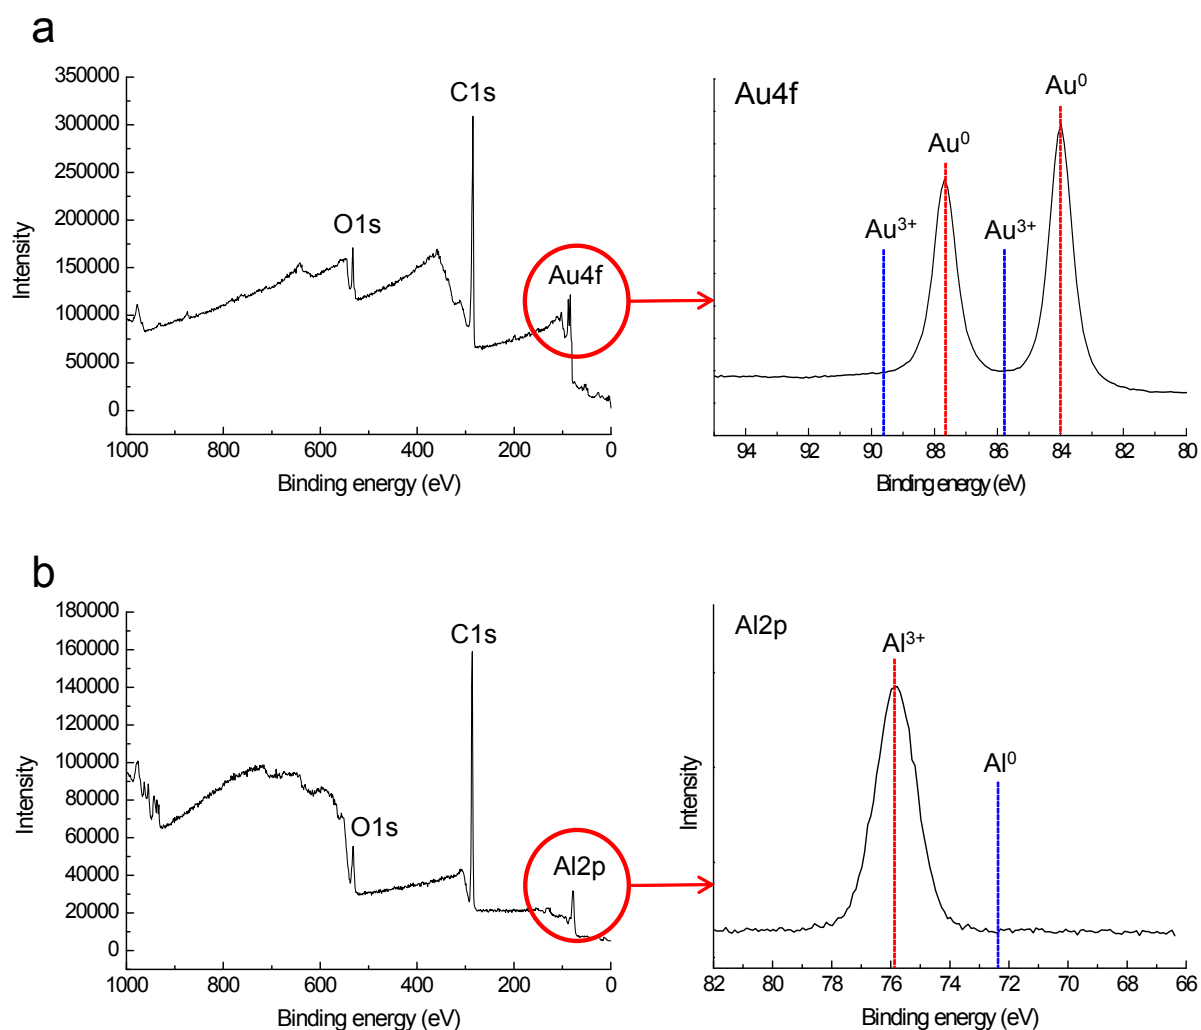

**Fig. S1** XPS spectra of (a) the Au-doped and (b) Al-doped 3D rGO emitters, respectively. The Au<sup>3+</sup> was spontaneously reduced upon acceptance of electrons from the graphene, resulted in the Au<sup>0</sup> as a dominant Au species due to the higher reduction potential for the Au<sup>3+</sup> compared to the rGO. In contrast, the rGO easily accepted electrons from Al<sup>0</sup> due to the negative relative reduction potential from Al to rGO, resulted in the Al<sup>3+</sup> as a dominant Al species.

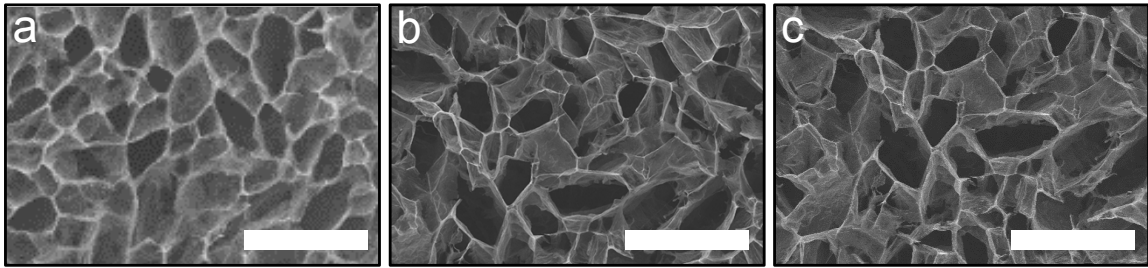

**Fig. S2** SEM image of (a) the undoped, (b) Au-doped, and (c) Al-doped 3D rGO emitters, respectively. The scale bars indicate 200  $\mu\text{m}$ .
